# Supplementary material for: Population dynamics of Hippophae rhamnoides shrub in response of sea-level rise and insect outbreaks
Source: PubMed Central journal article supplement (PMC7242017; doi:10.1371/journal.pone.0233011), 2020-05-21
Supplement: pone.0233011.s001.pdf [file pone.0233011.s001.pdf]

**S1 Table. Aerial photograph metadata.**

| Year | Source                       | Scale   | Type         | Usage                           |
|------|------------------------------|---------|--------------|---------------------------------|
| 2014 | Topographic service Cadastre | 1:18000 | Colour       | Yes                             |
| 2011 | Topographic service Cadastre | 1:18000 | Colour       | No, heterogeneous image quality |
| 2011 | Topographic service Cadastre | 1:18000 | Colour       | No, heterogeneous image quality |
| 2009 | Topographic service Cadastre | 1:18000 | Colour       | Yes                             |
| 2009 | Topographic service Cadastre | 1:18000 | Colour       | Yes                             |
| 2004 | Topographic service Cadastre | 1:18000 | Panchromatic | No, does not cover study area   |
| 2000 | Archive                      | 1:18000 | Panchromatic | Yes                             |
| 1996 | Cadastre                     | 1:18000 | Panchromatic | No, insufficient quality        |
| 1992 | Archive                      | 1:18000 | Panchromatic | No, does not cover study area   |
| 1990 | Cadastre                     | 1:18000 | Panchromatic | No, insufficient quality        |
| 1986 | Archive                      | 1:18000 | Panchromatic | Yes                             |
| 1986 | Archive                      | 1:18000 | Panchromatic | Yes                             |
| 1979 | Cadastre                     | 1:18000 | Panchromatic | No, insufficient quality        |
| 1969 | Archive                      | 1:20000 | Panchromatic | No, insufficient quality        |
| 1959 | Archive                      | 1:20000 | Panchromatic | Yes                             |
| 1949 | Cadastre                     | 1:20000 | Panchromatic | No, insufficient quality        |
