# Supplementary material for: Population dynamics of Hippophae rhamnoides shrub in response of sea-level rise and insect outbreaks
Source: PubMed Central journal article supplement (PMC7242017; doi:10.1371/journal.pone.0233011), 2020-05-21
Supplement: pone.0233011.s002.pdf [file pone.0233011.s002.pdf]

68 **S2 Table. Descriptive statistics for the sampled shrubs in the six strata. The effect on the total**  
 69 **time series of different steps in the correction process is also shown.**

| General info &<br>Stratum | Number of<br>samples | Measured age | Establishment |      | Growth statistics |          |          |          |       |          |
|---------------------------|----------------------|--------------|---------------|------|-------------------|----------|----------|----------|-------|----------|
|                           |                      | Mean age     | First         | Mean | Mean              | Median   | Stdev    | Skew     | Gini  | AR1      |
| Raw ring-width            | 196                  | 18           | 1967          | 1999 | 0.75 mm           | 0.67 mm  | 0.48 mm  | 0.57 [-] | 0.33% | 0.28 [-] |
| Detrended ring-width      | 196                  | 18           | 1967          | 1999 | 1.04 [-]          | 0.94 [-] | 0.62 [-] | 0.52 [-] | 0.32% | 0.26 [-] |
| 1: Old Low                | 33                   | 19           | 1974          | 1999 | 1.16 [-]          | 1.07 [-] | 0.66 [-] | 0.38 [-] | 0.29% | 0.25 [-] |
| 2: Old Medium             | 33                   | 22           | 1967          | 1996 | 1.13 [-]          | 1.02 [-] | 0.60 [-] | 0.46 [-] | 0.30% | 0.34 [-] |
| 3: Old High               | 33                   | 20           | 1970          | 1999 | 1.07 [-]          | 0.94 [-] | 0.62 [-] | 0.57 [-] | 0.30% | 0.25 [-] |
| 4: Young Low              | 32                   | 15           | 1983          | 2003 | 0.97 [-]          | 0.89 [-] | 0.67 [-] | 0.49 [-] | 0.34% | 0.19 [-] |
| 5: Young Medium           | 32                   | 15           | 1991          | 2001 | 0.79 [-]          | 0.74 [-] | 0.51 [-] | 0.44 [-] | 0.35% | 0.25 [-] |
| 6: Young High             | 33                   | 17           | 1986          | 2000 | 1.10 [-]          | 0.98 [-] | 0.67 [-] | 0.76 [-] | 0.32% | 0.31 [-] |

70
