# Supplementary material for: Population dynamics of Hippophae rhamnoides shrub in response of sea-level rise and insect outbreaks
Source: PubMed Central journal article supplement (PMC7242017; doi:10.1371/journal.pone.0233011), 2020-05-21
Supplement: pone.0233011.s003.pdf [file pone.0233011.s003.pdf]

**S1 Fig. Annual growth vs age for all samples, with RCS detrending curve.**

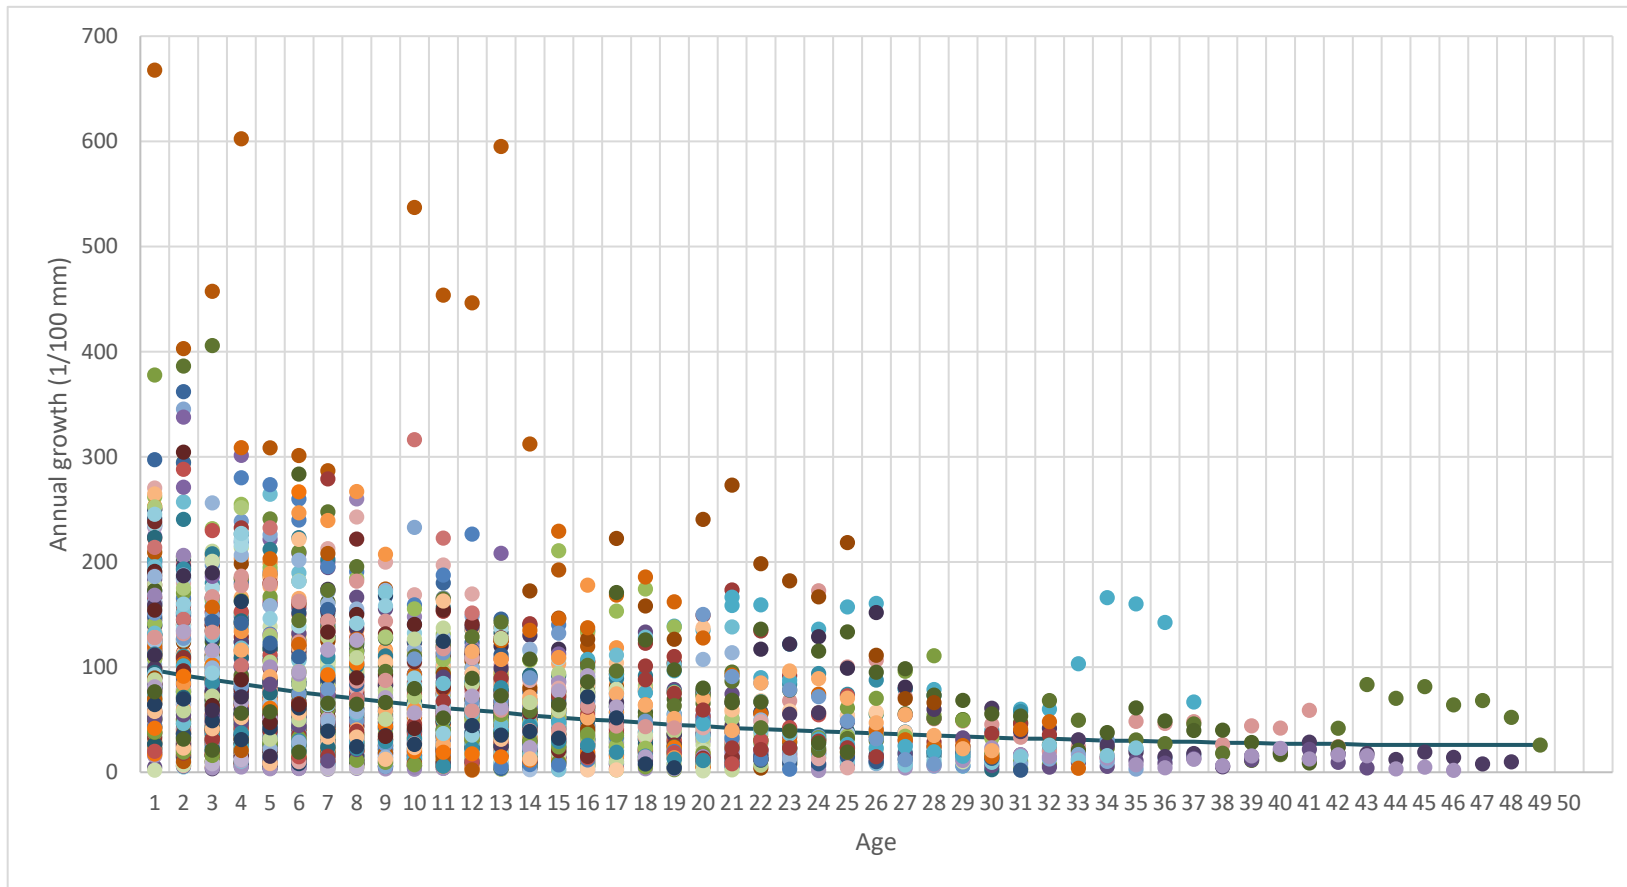

3

4
