# Supplementary material for: Population dynamics of Hippophae rhamnoides shrub in response of sea-level rise and insect outbreaks
Source: PubMed Central journal article supplement (PMC7242017; doi:10.1371/journal.pone.0233011), 2020-05-21

7 **S2 Fig. Average flood frequency in different strata within the study area before and during**  
8 **the growing season. The frequency of flooding has increased since the start of gas extraction**  
9 **in 1986.**

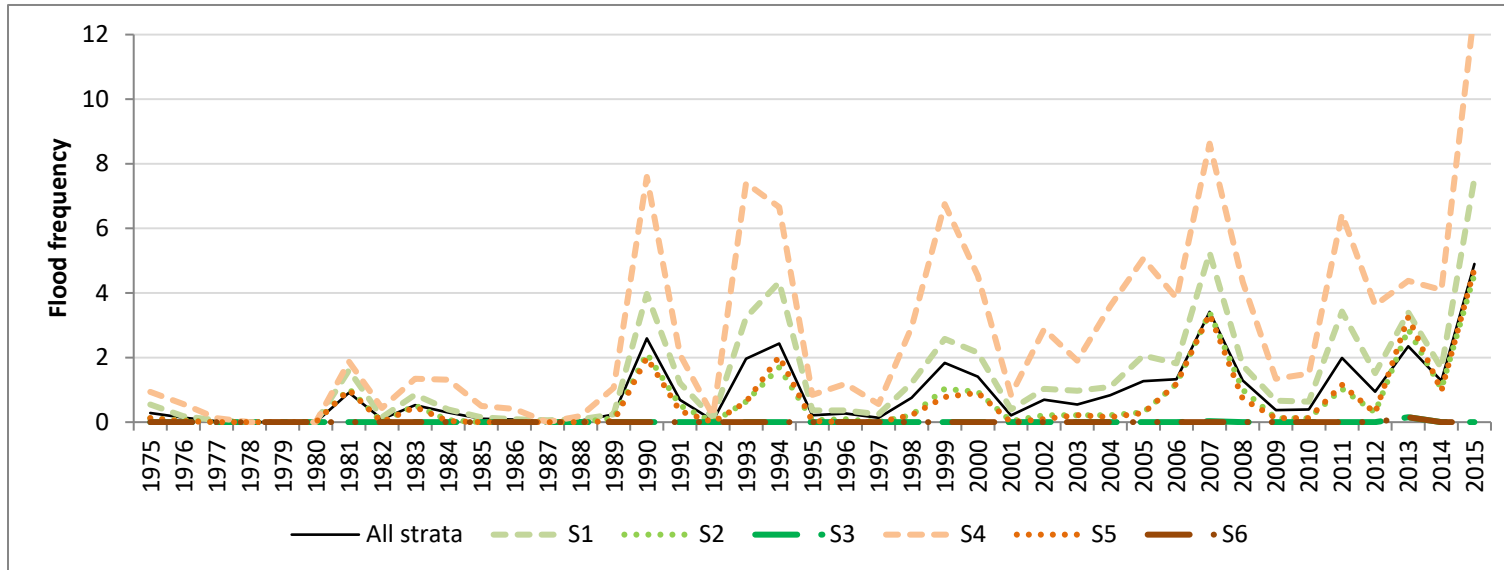

Supplement: pone.0233011.s004.pdf [file pone.0233011.s004.pdf]
