# Supplementary material for: Population dynamics of Hippophae rhamnoides shrub in response of sea-level rise and insect outbreaks
Source: PubMed Central journal article supplement (PMC7242017; doi:10.1371/journal.pone.0233011), 2020-05-21

10 **S3 Fig. Seasonality of seawater floods, showing that flooding**  
11 **occurs predominantly in winter. The first flood events in**  
12 **April and July occurred in 2015.**

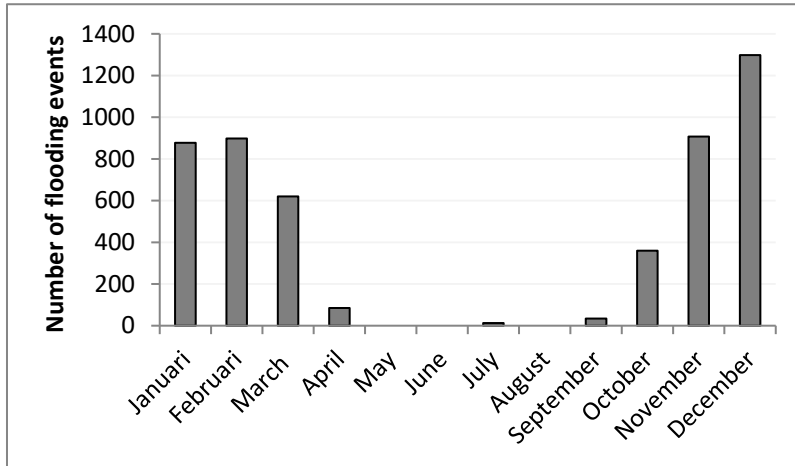

Supplement: pone.0233011.s005.pdf [file pone.0233011.s005.pdf]
