# Supplementary material for: Population dynamics of Hippophae rhamnoides shrub in response of sea-level rise and insect outbreaks
Source: PubMed Central journal article supplement (PMC7242017; doi:10.1371/journal.pone.0233011), 2020-05-21

**S4 Fig. Groundwater depth (cm) in the growing season (April-August).**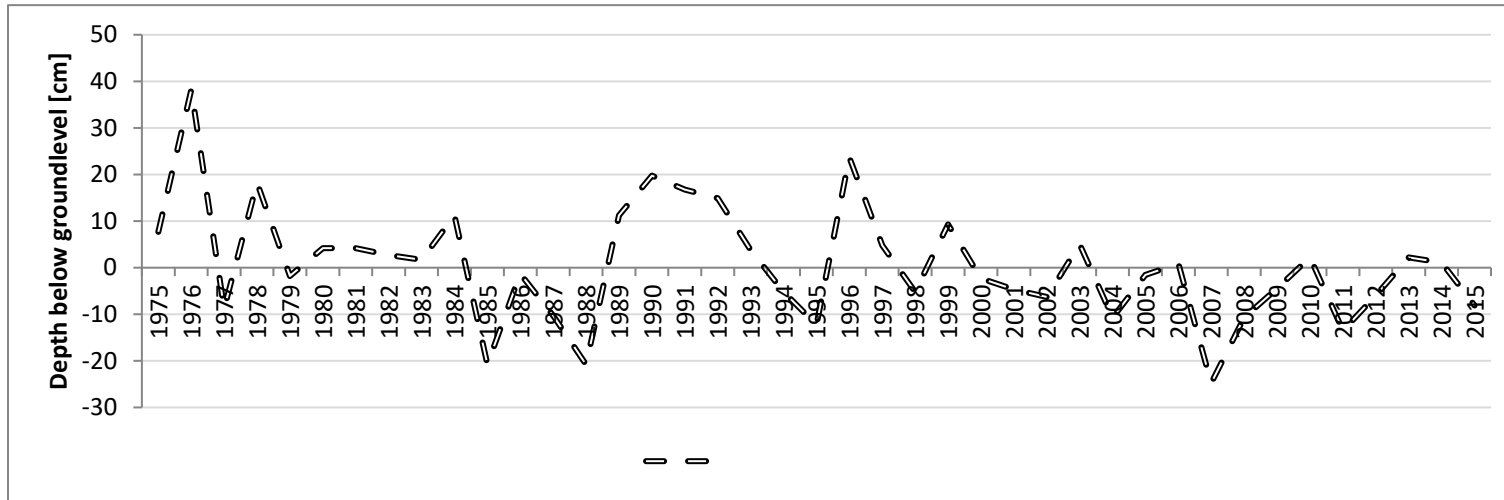

Supplement: pone.0233011.s006.pdf [file pone.0233011.s006.pdf]
