# Supplementary material for: Population dynamics of Hippophae rhamnoides shrub in response of sea-level rise and insect outbreaks
Source: PubMed Central journal article supplement (PMC7242017; doi:10.1371/journal.pone.0233011), 2020-05-21

**S5 Fig. Net precipitation time-series for the whole year and growing, winter season**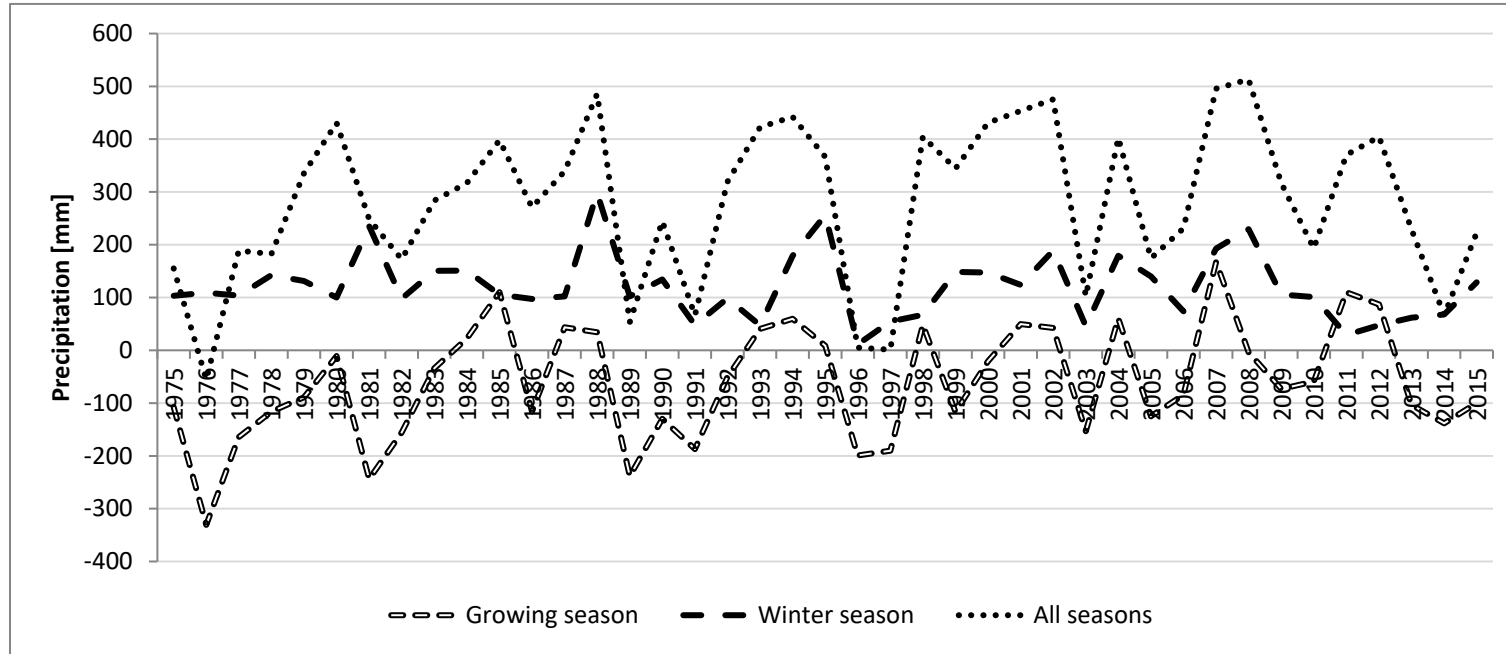

Supplement: pone.0233011.s007.pdf [file pone.0233011.s007.pdf]
