# Supplementary material for: Population dynamics of Hippophae rhamnoides shrub in response of sea-level rise and insect outbreaks
Source: PubMed Central journal article supplement (PMC7242017; doi:10.1371/journal.pone.0233011), 2020-05-21

**S6 Fig. Mean temperatures time-series for the whole year and growing, winter season.**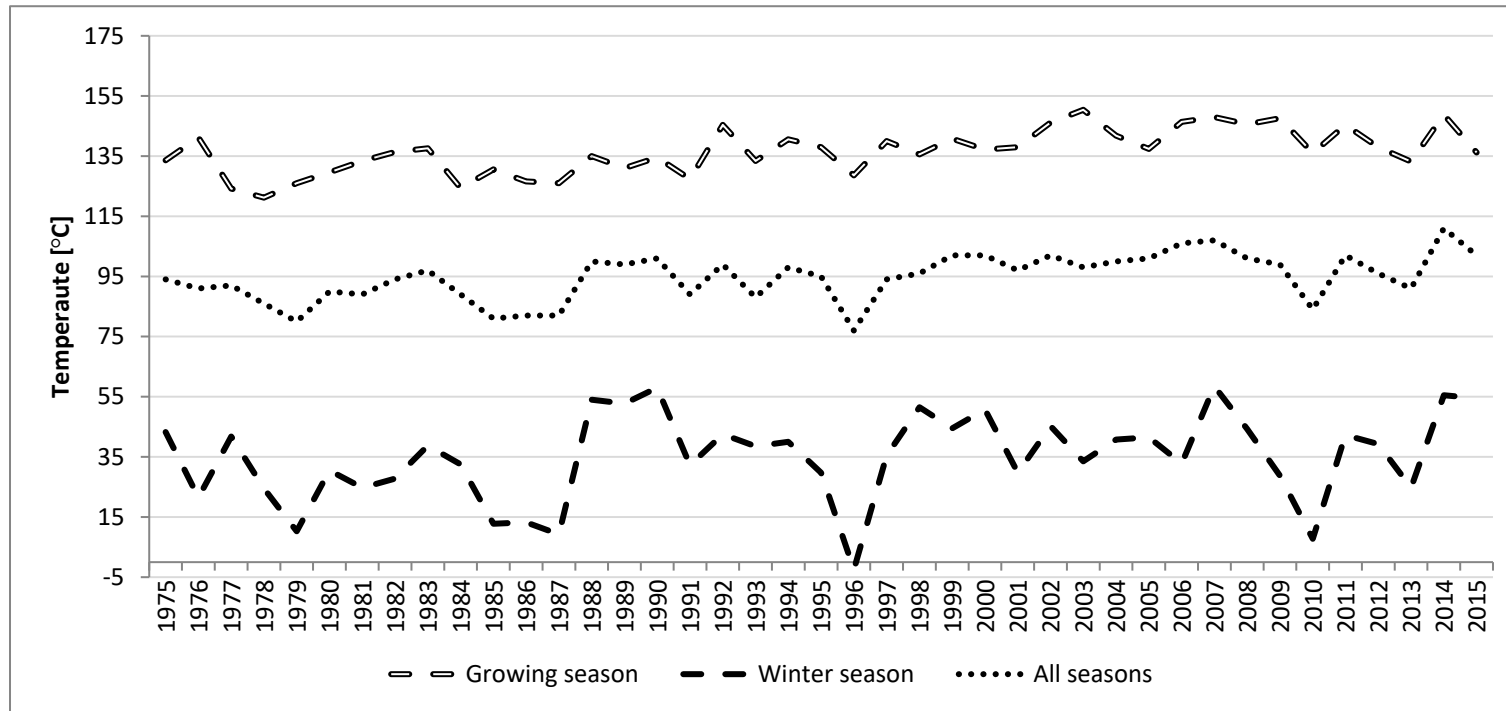

Supplement: pone.0233011.s008.pdf [file pone.0233011.s008.pdf]
