# Supplementary material for: Population dynamics of Hippophae rhamnoides shrub in response of sea-level rise and insect outbreaks
Source: PubMed Central journal article supplement (PMC7242017; doi:10.1371/journal.pone.0233011), 2020-05-21
Supplement: pone.0233011.s009.pdf [file pone.0233011.s009.pdf]

16 **S7 Fig. Photograph taken in 1959 with green areas classified**  
17 **as sea-buckthorn.**

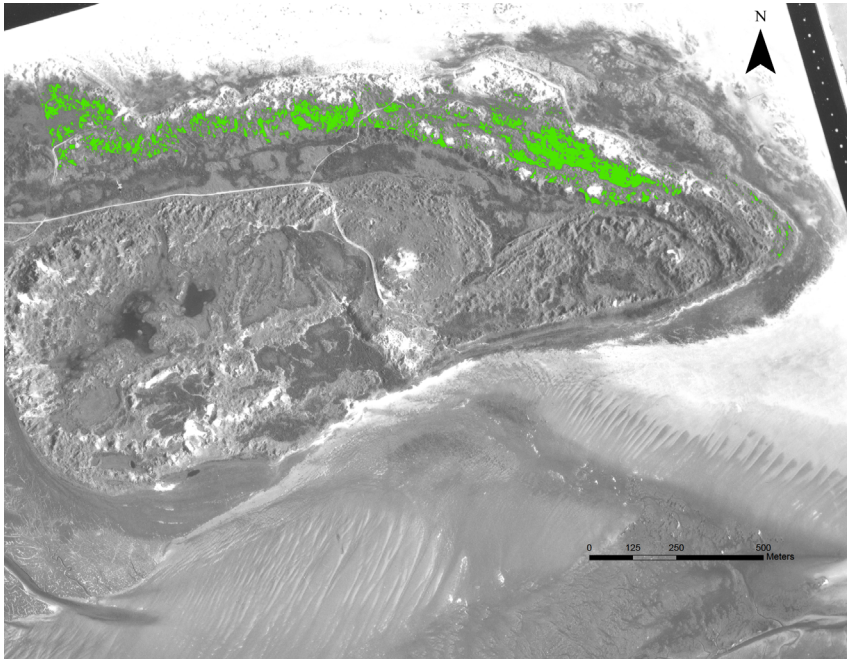

18

19
