# Supplementary material for: Population dynamics of Hippophae rhamnoides shrub in response of sea-level rise and insect outbreaks
Source: PubMed Central journal article supplement (PMC7242017; doi:10.1371/journal.pone.0233011), 2020-05-21
Supplement: pone.0233011.s011.pdf [file pone.0233011.s011.pdf]

22

23 **S9 Fig. Photograph taken in 2000 with green areas classified**  
24 **as sea-buckthorn.**

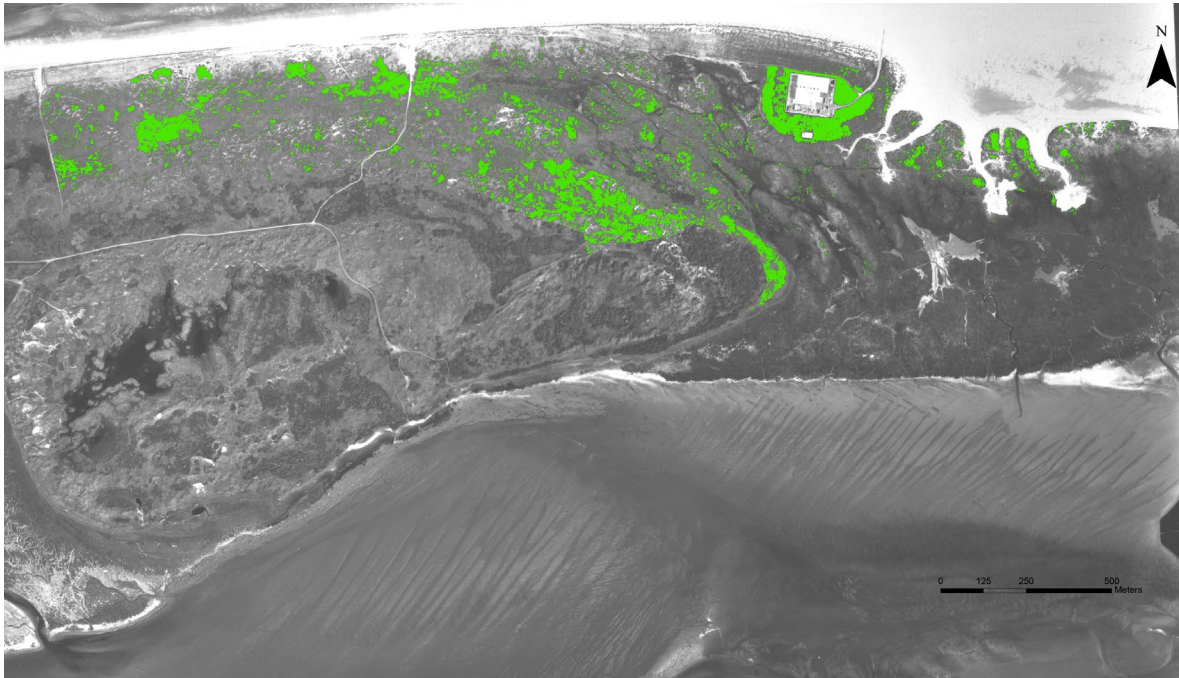

25

26
