# Supplementary material for: Population dynamics of Hippophae rhamnoides shrub in response of sea-level rise and insect outbreaks
Source: PubMed Central journal article supplement (PMC7242017; doi:10.1371/journal.pone.0233011), 2020-05-21

27 **S10 Fig. Photograph taken in 2009 with green areas**  
28 **classified as sea-buckthorn.**

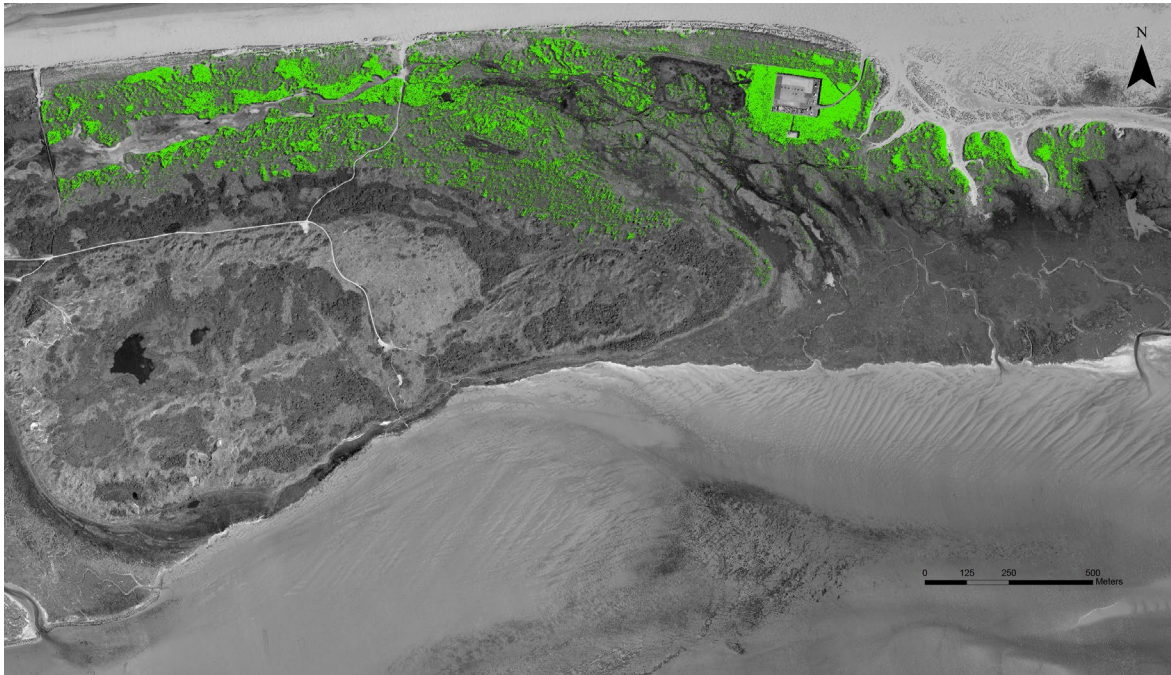

Supplement: pone.0233011.s012.pdf [file pone.0233011.s012.pdf]
