# Supplementary material for: Population dynamics of Hippophae rhamnoides shrub in response of sea-level rise and insect outbreaks
Source: PubMed Central journal article supplement (PMC7242017; doi:10.1371/journal.pone.0233011), 2020-05-21
Supplement: pone.0233011.s013.pdf [file pone.0233011.s013.pdf]

29

30 **S11 Fig. Photograph taken in 2014 with green areas**  
31 **classified as sea-buckthorn.**

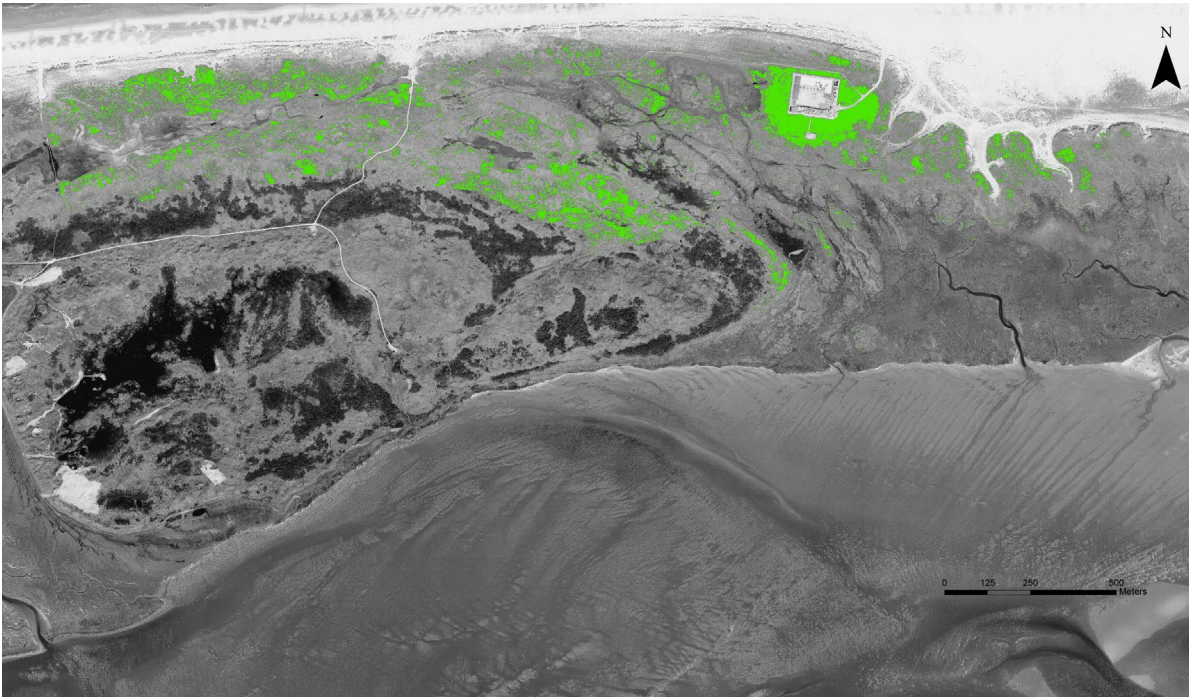

32

33
