# Supplementary material for: Population dynamics of Hippophae rhamnoides shrub in response of sea-level rise and insect outbreaks
Source: PubMed Central journal article supplement (PMC7242017; doi:10.1371/journal.pone.0233011), 2020-05-21
Supplement: pone.0233011.s016.pdf [file pone.0233011.s016.pdf]

50 **S14 Fig. Sea-buckthorn cover changes between 2000 and**  
51 **2009 (red=disappeared, yellow=appeared, blue=remained).**  
52 **The other colours represent the strata as denoted in Fig 2B**  
53 **of the article. Note that the larger blue/red patches in the**  
54 **far west are sea-buckthorn mixed with willow species (*Salix***  
55 **sp.).**

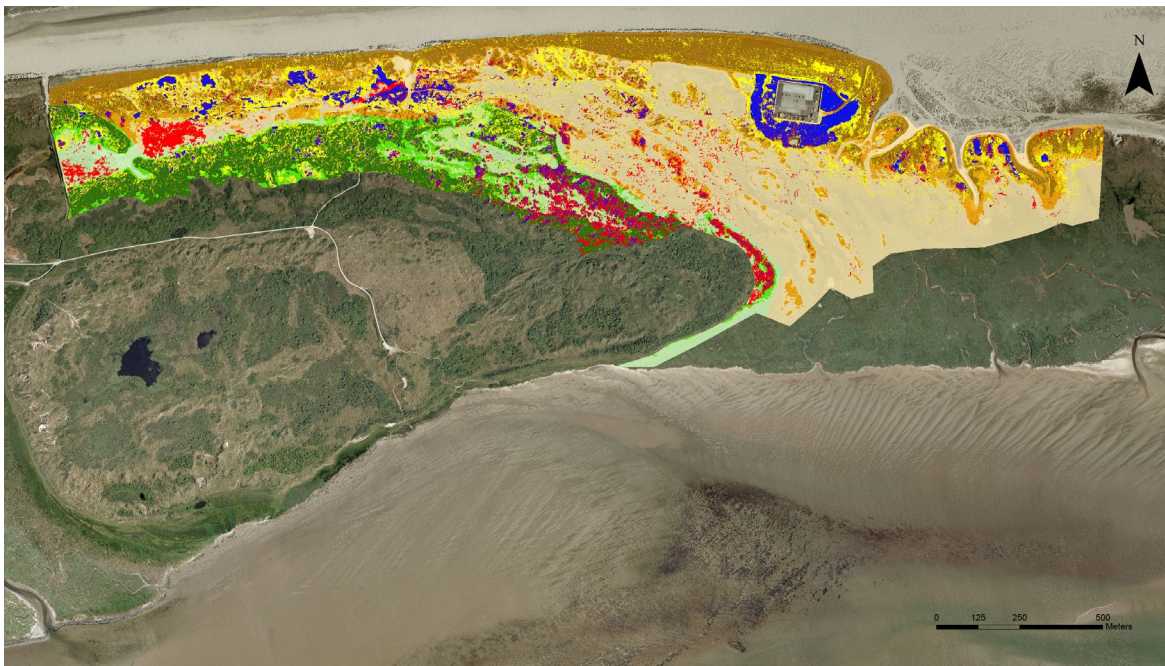

56

57
