# Supplementary material for: Population dynamics of Hippophae rhamnoides shrub in response of sea-level rise and insect outbreaks
Source: PubMed Central journal article supplement (PMC7242017; doi:10.1371/journal.pone.0233011), 2020-05-21
Supplement: pone.0233011.s017.pdf [file pone.0233011.s017.pdf]

58 **S15 Fig. Sea-buckthorn cover changes between 2009 and**  
59 **2014 (red=disappeared, yellow=appeared, blue=remained).**  
60 **The other colours represent the strata as denoted in Fig 2B**  
61 **of the article. Note that the larger blue/red patches in the**  
62 **far west are sea-buckthorn mixed with willow species (*Salix***  
63 **sp.).**

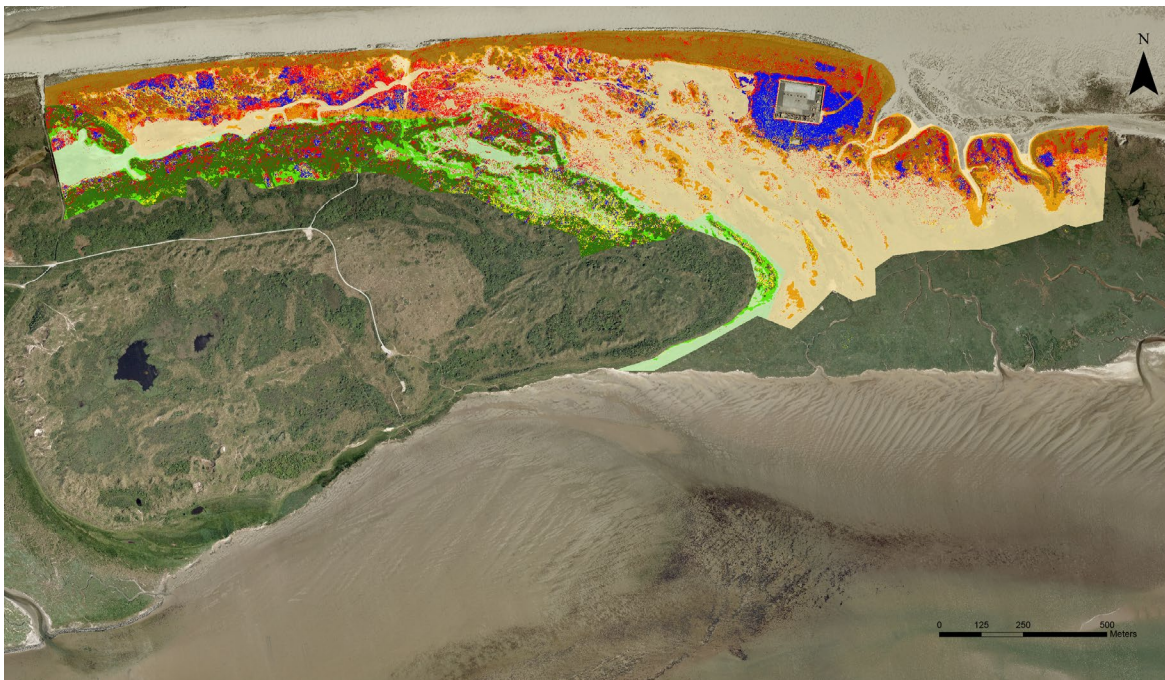

64

65
