# Supplementary material for: Population dynamics of Hippophae rhamnoides shrub in response of sea-level rise and insect outbreaks
Source: PubMed Central journal article supplement (PMC7242017; doi:10.1371/journal.pone.0233011), 2020-05-21

66 **S16 Fig. Sea-buckthorn cover changes between 1959 and**  
67 **2014 – summed data over all strata.**

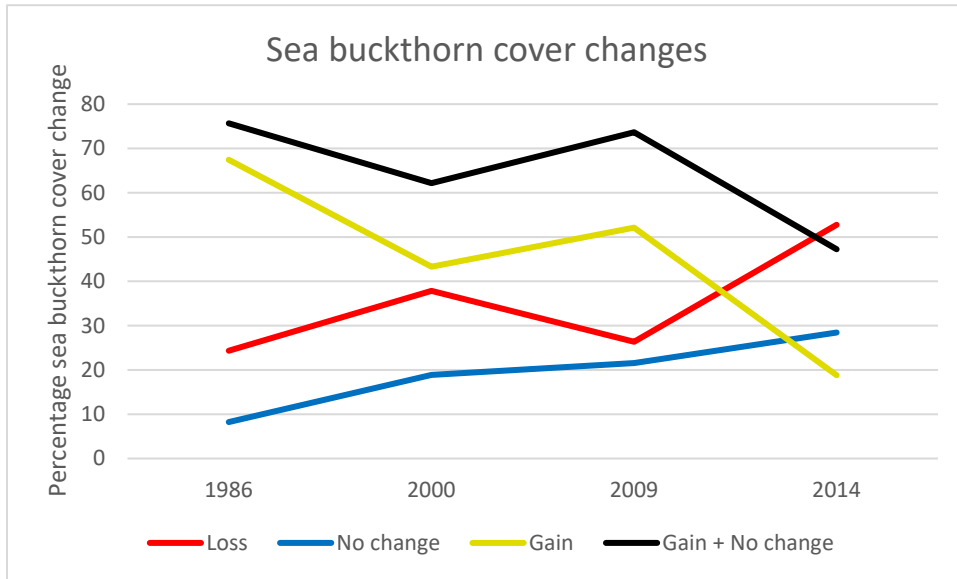

Supplement: pone.0233011.s018.pdf [file pone.0233011.s018.pdf]
